# Supplementary material for: Antitumor effects of melanin fromLachnumYM226 and its derivative in H22 tumor-bearing mice
Source: Royal Society of Chemistry journal article supplement (doi:10.1039/c8md00035b), 2018-01-01
Supplement: c8md00035b1.pdf [file c8md00035b1.pdf]

## Supplementary Information

### Antitumor effects of melanin from *Lachnum* YM226 and its derivative in H22 tumor-bearing mice

Fang Shi, Jinglei Li, Ziyang Ye, Liuqing Yang, Tingting Chen, Xue Chen\*, Ming  
Ye\*

*School of Food Science and Engineering, Hefei University of Technology, Hefei  
230009, China*

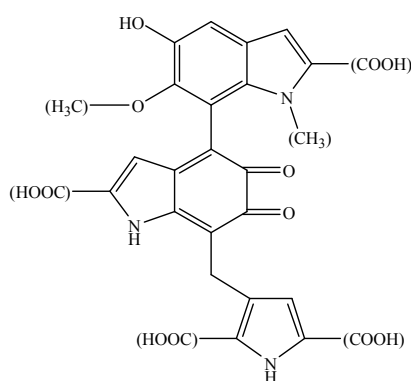

**Fig. S1** The possible chemical structures of LM<sup>1</sup>

### References

1. S. Song, S. Li, N. Su, J. Li, F. Shi and M. Ye, *Food Funct.*, 2016, **7**, 3617-3627.
